# Supplementary material for: Effect of population, collection year, after-ripening and incubation condition on seed germination of Stipa bungeana
Source: PubMed Central journal article supplement (PMC5655671; doi:10.1038/s41598-017-14267-2), 2017-10-24
Supplement: 41598_2017_14267_MOESM1_ESM.pdf [file 41598_2017_14267_MOESM1_ESM.pdf]

## Supplementary Information

### **Effect of population, collection year, after-ripening and incubation conditions on seed germination of *Stipa bungeana***

Rui Zhang<sup>1</sup>, J. M. Baskin<sup>2</sup>, C. C. Baskin<sup>2,3</sup>, Qing Mo<sup>1</sup>, Lijun Chen<sup>1</sup>, Xiaowen Hu<sup>1\*</sup>, Yanrong Wang<sup>1\*</sup>

<sup>1</sup>State Key Laboratory of Grassland Agro-ecosystems, China, College of Pastoral Agriculture Science and Technology, Lanzhou University, Lanzhou, 730020, China;

<sup>2</sup>Department of Biology, University of Kentucky, Lexington, KY 40506, USA;

<sup>3</sup>Department of Plant and Soil Sciences, University of Kentucky, Lexington, KY 40546, USA.

Running head title: seed germination of *Stipa bungeana*

\*Author for correspondence: XiaoWen Hu, YanRong Wang

Address: College of Pastoral Agriculture Science and Technology, Lanzhou University, No.768

Jiayuguan West Road, Chengguan District, Lanzhou, 730020, China

Fax: 86-0931-8914043

Tel: 86-13519646178

Email: huxw@lzu.edu.cn; yrwang@lzu.edu.cn

## Supplementary Information

Table S1 Results of the generalized linear mixed effects models (GLMMs) on the effect of year ( $Y$ ), storage (seed dormancy states) ( $S$ ), temperature ( $T$ ), population ( $P$ ) and their interactions on seed germination percentage of *Stipa bungeana*.

|                                | Wald statistic | n.d.f. | F statistic | F-pr   |
|--------------------------------|----------------|--------|-------------|--------|
| Year ( $Y$ )                   | 16.87          | 1      | 16.87       | <0.001 |
| Storage ( $S$ )                | 267.03         | 1      | 267.03      | <0.001 |
| Temperature ( $T$ )            | 118.31         | 2      | 59.15       | <0.001 |
| Population ( $P$ )             | 128.73         | 7      | 18.39       | <0.001 |
| $Y \times S$                   | 4.27           | 1      | 4.27        | 0.039  |
| $Y \times T$                   | 27.96          | 2      | 13.98       | <0.001 |
| $S \times T$                   | 309.22         | 2      | 154.61      | <0.001 |
| $Y \times P$                   | 341.03         | 7      | 48.72       | <0.001 |
| $S \times P$                   | 98.03          | 7      | 14          | <0.001 |
| $T \times P$                   | 23.35          | 14     | 1.67        | 0.059  |
| $Y \times S \times T$          | 18.28          | 2      | 9.14        | <0.001 |
| $Y \times S \times P$          | 66.77          | 7      | 9.54        | <0.001 |
| $Y \times T \times P$          | 21.88          | 14     | 1.56        | 0.086  |
| $S \times T \times P$          | 25.06          | 14     | 1.79        | 0.037  |
| $Y \times S \times T \times P$ | 6.41           | 14     | 0.46        | 0.954  |

Table S2 Results of the generalized linear mixed effects models (GLMMs) on the effect of year (*Y*), storage (seed dormancy states) (*S*), water potential (*W*), population (*P*) and their interactions on seed germination percentage of *Stipa bungeana*.

|                     | Wald statistic | d.f. | Wald/d.f. | Chi pr |
|---------------------|----------------|------|-----------|--------|
| Year (Y)            | 0.11           | 1    | 0.11      | 0.737  |
| Storage (S)         | 22.28          | 1    | 22.28     | <0.001 |
| Water potential (W) | 920.22         | 3    | 306.74    | <0.001 |
| Population (P)      | 158.16         | 7    | 22.59     | <0.001 |
| Y×S                 | 34.02          | 1    | 34.02     | <0.001 |
| Y×W                 | 24.57          | 3    | 8.19      | <0.001 |
| S×W                 | 13.64          | 3    | 4.55      | 0.003  |
| Y×S                 | 485.77         | 7    | 69.4      | <0.001 |
| S×P                 | 54.9           | 7    | 7.84      | <0.001 |
| W×P                 | 139.41         | 21   | 6.64      | <0.001 |
| Y×S×W               | 157.74         | 3    | 52.58     | <0.001 |
| Y×S×P               | 29.03          | 7    | 4.15      | <0.001 |
| Y×W×P               | 75             | 21   | 3.57      | <0.001 |
| S×W×P               | 31.93          | 21   | 1.52      | 0.06   |
| Y×S×W×P             | 37.08          | 21   | 1.77      | 0.016  |

**Table S3A Correlations between geographic location and germination percentages of fresh and stored seeds of *Stipa bungeana* from eight natural populations incubated at three temperature regimes.**

|           |   | Germination percentage (%) |        |          |        |          |        |
|-----------|---|----------------------------|--------|----------|--------|----------|--------|
|           |   | 10/20 °C                   |        | 15/25 °C |        | 20/30 °C |        |
|           |   | Fresh                      | Stored | Fresh    | Stored | Fresh    | Stored |
| Longitude | R | -0.054                     | -0.229 | 0.159    | -0.307 | 0.273    | -0.138 |
|           | P | 0.843                      | 0.393  | 0.555    | 0.248  | 0.307    | 0.609  |
| Latitude  | R | -0.146                     | 0.055  | 0.076    | -0.245 | 0.022    | -0.066 |
|           | P | 0.589                      | 0.838  | 0.780    | 0.360  | 0.934    | 0.809  |
| Altitude  | R | -0.066                     | 0.185  | -0.332   | 0.210  | -0.333   | 0.031  |
|           | P | 0.809                      | 0.492  | 0.209    | 0.436  | 0.207    | 0.911  |

**Table S3B Correlations between geographic location and germination percentages of fresh and stored seeds of *Stipa bungeana* from eight natural populations incubated at four water potentials.**

|           |   | Germination percentage (%) |        |        |        |        |        |        |        |
|-----------|---|----------------------------|--------|--------|--------|--------|--------|--------|--------|
|           |   | CK                         |        | -0.2   |        | -0.4   |        | -0.6   |        |
|           |   | Fresh                      | Stored | Fresh  | Stored | Fresh  | Stored | Fresh  | Stored |
| Longitude | R | -0.150                     | -0.105 | 0.200  | 0.038  | 0.052  | 0.126  | 0.013  | 0.264  |
|           | P | 0.579                      | 0.699  | 0.459  | 0.890  | 0.850  | 0.643  | 0.963  | 0.323  |
| Latitude  | R | -0.171                     | -0.207 | 0.055  | 0.044  | 0.088  | 0.079  | 0.165  | 0.286  |
|           | P | 0.527                      | 0.441  | 0.839  | 0.872  | 0.745  | 0.772  | 0.542  | 0.282  |
| Altitude  | R | -0.144                     | -0.013 | -0.413 | -0.154 | -0.241 | -0.208 | -0.038 | -0.322 |
|           | P | 0.594                      | 0.961  | 0.112  | 0.569  | 0.370  | 0.439  | 0.888  | 0.224  |

**Table S4A Correlations between climate and germination percentages of fresh and stored seeds of *Stipa bungeana* from eight natural populations incubated at three temperature regimes.**

|                          |   | Germination (%) |        |          |        |          |        |
|--------------------------|---|-----------------|--------|----------|--------|----------|--------|
|                          |   | 10/20 °C        |        | 15/25 °C |        | 20/30 °C |        |
|                          |   | Fresh           | Stored | Fresh    | Stored | Fresh    | Stored |
| Mean monthly temperature | R | 0.620*          | 0.434  | 0.352    | 0.159  | 0.244    | 0.500  |
|                          | P | <b>0.018</b>    | 0.121  | 0.217    | 0.587  | 0.401    | 0.069  |
| Monthly total rainfall   | R | 0.282           | -0.139 | -0.012   | -0.039 | -0.207   | -0.062 |
|                          | P | 0.328           | 0.636  | 0.968    | 0.894  | 0.477    | 0.832  |

“\*” Significant correlation between the two factors at 0.05 level.

**Table S4B Correlations between climate and germination percentages of fresh and stored seeds of *Stipa bungeana* from eight natural populations incubated at four water potentials.**

|                          |   | Germination percentage (%) |        |        |              |              |        |        |        |
|--------------------------|---|----------------------------|--------|--------|--------------|--------------|--------|--------|--------|
|                          |   | CK                         |        | -0.2   |              | -0.4         |        | -0.6   |        |
|                          |   | Fresh                      | Stored | Fresh  | Stored       | Fresh        | Stored | Fresh  | Stored |
| Mean monthly temperature | R | 0.381                      | 0.340  | 0.412  | 0.596*       | 0.652*       | 0.384  | 0.440  | 0.025  |
|                          | P | 0.179                      | 0.235  | 0.143  | <b>0.024</b> | <b>0.012</b> | 0.175  | 0.115  | 0.932  |
| Monthly total rainfall   | R | -0.189                     | -0.028 | -0.327 | -0.039       | -0.154       | -0.271 | -0.006 | -0.337 |
|                          | P | 0.516922                   | 0.923  | 0.253  | 0.894        | 0.599        | 0.348  | 0.984  | 0.239  |

“\*” Significant correlation between the two factors at 0.05 level.
